# Supplementary material for: RNA‐Seq of in planta‐expressed Magnaporthe oryzae genes identifies MoSVP as a highly expressed gene required for pathogenicity at the initial stage of infection
Source: PubMed Central journal article supplement (PMC6859710; doi:10.1111/mpp.12869), 2019-09-27
Supplement: MPP-20-1682-s010.pdf [file MPP-20-1682-s010.pdf]

**Table S1** Assembly metrics of the reference genome of *M. oryzae* isolate Ina168.

| <b>Features</b>                      | <b>Strain</b> |              |
|--------------------------------------|---------------|--------------|
|                                      | <b>Ina168</b> | <b>70-15</b> |
| Total reads (Gb)                     | 1.92          | -            |
| Coverage (fold)                      | 48.4          | -            |
| Number of contigs                    | 1,978         | -            |
| Average contigs length (kp)          | 20.02         | -            |
| Maximum contig length (kp)           | 920.1         | -            |
| N50 contig length (kb)               | 162.9         | -            |
| Assembly size (Mb)                   | 39.61         | 41.03        |
| A                                    | 9,676,511     | 9,901,089    |
| T                                    | 9,666,293     | 9,915,530    |
| G                                    | 10,120,238    | 10,574,756   |
| C                                    | 10,131,235    | 10,558,558   |
| N                                    | 19,978        | 77,800       |
| Assembly size with A/T/G/C only (Mb) | 39.59         | 40.95        |
| G+C composition (%)                  | 51.1          | 51.6         |

Contigs shorter than 500 bp were excluded.
