# Supplementary material for: RNA‐Seq of in planta‐expressed Magnaporthe oryzae genes identifies MoSVP as a highly expressed gene required for pathogenicity at the initial stage of infection
Source: PubMed Central journal article supplement (PMC6859710; doi:10.1111/mpp.12869), 2019-09-27
Supplement: MPP-20-1682-s011.pdf [file MPP-20-1682-s011.pdf]

**Table S2** Coverage of conserved eukaryotic genes in *M. oryzae* isolate Ina168 and 70-15 genome sequences analyzed by CEGMA.

| Strain | Complete*   | Partial*    |
|--------|-------------|-------------|
| Ina168 | 236 (95.2%) | 242 (97.6%) |
| 70-15  | 236 (95.2%) | 242 (97.6%) |

\* Number of genes that exhibited a homology to the protein sequences from the 248 core eukaryotic genes with 'complete' and 'partial' coverage for the CEGMA analysis.
