# Supplementary material for: RNA‐Seq of in planta‐expressed Magnaporthe oryzae genes identifies MoSVP as a highly expressed gene required for pathogenicity at the initial stage of infection
Source: PubMed Central journal article supplement (PMC6859710; doi:10.1111/mpp.12869), 2019-09-27
Supplement: MPP-20-1682-s012.pdf [file MPP-20-1682-s012.pdf]

**Table S3** Summary of RNA-seq reads and mapping statistics.

| Sample  | Replication | <sup>a</sup> Total clean reads | <sup>b</sup> Mapping to Ina168 reference genome | b /a *100 (%) |
|---------|-------------|--------------------------------|-------------------------------------------------|---------------|
| Conidia | -1          | 3,787,507                      | 3,712,988                                       | 98.0%         |
|         | -2          | 4,278,481                      | 3,927,887                                       | 91.8%         |
|         | -3          | 4,566,448                      | 4,354,557                                       | 95.4%         |
| 12 hpi  | -1          | 21,911,609                     | 205,875                                         | 0.9%          |
|         | -2          | 18,863,494                     | 443,718                                         | 2.4%          |
|         | -3          | 21,067,292                     | 746,316                                         | 3.5%          |
| 24 hpi  | -1          | 18,336,408                     | 273,898                                         | 1.5%          |
|         | -2          | 16,535,399                     | 454,551                                         | 2.7%          |
|         | -3          | 17,890,040                     | 531,192                                         | 3.0%          |
| 36 hpi  | -1          | 23,380,354                     | 1,427,532                                       | 6.1%          |
|         | -2          | 16,869,313                     | 1,225,044                                       | 7.3%          |
|         | -3          | 21,487,630                     | 2,579,929                                       | 12.0%         |
| 48 hpi  | -1          | 11,155,133                     | 2,285,789                                       | 20.5%         |
|         | -2          | 10,045,391                     | 3,754,649                                       | 37.4%         |
|         | -3          | 9,699,083                      | 2,789,260                                       | 28.8%         |
