# Supplementary material for: RNA‐Seq of in planta‐expressed Magnaporthe oryzae genes identifies MoSVP as a highly expressed gene required for pathogenicity at the initial stage of infection
Source: PubMed Central journal article supplement (PMC6859710; doi:10.1111/mpp.12869), 2019-09-27
Supplement: MPP-20-1682-s014.pdf [file MPP-20-1682-s014.pdf]

**Table S5 Primers used for qRT-PCR and plasmid construction.**

| Primer name     | Sequence (5' -3')                       | Description                                                  |
|-----------------|-----------------------------------------|--------------------------------------------------------------|
| MoAct-fwd       | TCGACGTCGAAAGGATCTGT                    | Real-Time qRT-PCR for <i>MoAct</i>                           |
| MoAct-rev       | GAGCAATGATCTTGACCTTCATCG                |                                                              |
| HvUbi-fwd       | GCAAGTAAGTCCTGGTCATGA                   | Real-Time qRT-PCR for <i>HvUbi</i>                           |
| HvUbi-rev       | ACAACCAGACATGCTCCAACCT                  |                                                              |
| MoSVPko5fwd     | TATAGGGCGAATTGGATTTCGGGTTCAAAAACTGG     | Construction of the plasmid pGDMoSVP                         |
| MoSVPko5rev     | TCGAGGGGGGGCCCGGTGAAAAAGGGATTAAAGTT     |                                                              |
| MoSVPko3fwd     | GAATTCCTGCAGCCCTTTGGTCAAAAGGATCCAAAA    |                                                              |
| MoSVPko3rev     | GCTGGAGCTCCACCGTTCGCCAGCTGCCGTCAGTTC    |                                                              |
| pCB1636iv1fwd   | CGGTGGAGCTCCAGCTTTTGTTCCTC              |                                                              |
| pCB1636iv1rev   | GGGCTGCAGGAATTCGATATCAAGC               |                                                              |
| MGG_12247ko5fwd | AATTGGGTACCGGGCTGAATGAGCAAAGACCGCTTTC   | Construction of the plasmid for gene disruption of MGG_12247 |
| MGG_12247ko5rev | AACGTCGACCTCGAGATGATCACAAGACTGATGGGTC   |                                                              |
| MGG_12247ko3fwd | GAATTCCTGCAGCCCGTGAGGAAGGAGGTGGCAAGTG   |                                                              |
| MGG_12247ko3rev | GCTGGAGCTCCACCGGCTTGGCCATCAAGGGATGCTG   |                                                              |
| MGG_02253ko5fwd | TATAGGGCGAATTGGGATACCACCAGGAGCAAC       | Construction of the plasmid for gene disruption of MGG_02253 |
| MGG_02253ko5rev | TCGAGGGGGGGCCCGGTGAAAAGAAAGTGTGAAGG     |                                                              |
| MGG_02253ko3fwd | GAATTCCTGCAGCCCTGAGTGTCTGCGCACTGTCGTC   |                                                              |
| MGG_02253ko3rev | GCTGGAGCTCCACCGCGGGTCTGTTTAGGGGTTTTC    |                                                              |
| MGG_05083ko5fwd | AATTGGGTACCGGGCTCTGCACGTGGCGACCAACGTTG  | Construction of the plasmid for gene disruption of MGG_05083 |
| MGG_05083ko5rev | AACGTCGACCTCGAGGTTTGTCTCTCAAAGCAAGCG    |                                                              |
| MGG_05083ko3fwd | GAATTCCTGCAGCCCTTTTCTGGGGCTCGAAAATG     |                                                              |
| MGG_05083ko3rev | GCTGGAGCTCCACCGGCTTCTCCGTTGCCGCTGTG     |                                                              |
| MGG_09351ko5fwd | TATAGGGCGAATTGGGCGTCCAGCTGAACCGCG       | Construction of the plasmid for gene disruption of MGG_09351 |
| MGG_09351ko5rev | TCGAGGGGGGGCCCGCTTGAGGCAAGTTGTTCGAG     |                                                              |
| MGG_09351ko3fwd | GAATTCCTGCAGCCCTGAAAAGATGGGGTCATGTTATG  |                                                              |
| MGG_09351ko3rev | GCTGGAGCTCCACCGTCCGCTGGAACATAACTAAATC   |                                                              |
| MGG_01255ko5fwd | AATTGGGTACCGGGCGGGCCTTTGTAGAGAATGTAC    | Construction of the plasmid for gene disruption of MGG_01255 |
| MGG_01255ko5rev | AACGTCGACCTCGAGCTTTGTCTCTGTCGAGACTGTG   |                                                              |
| MGG_01255ko3fwd | GAATTCCTGCAGCCCTGTTGGGCGAGTTGGGACTAC    |                                                              |
| MGG_01255ko3rev | GCTGGAGCTCCACCGTCCGAATAGGGCGAATACTG     |                                                              |
| MGG_16125ko5fwd | TATAGGGCGAATTGGGCGCCCGCCGACCCGCAC       | Construction of the plasmid for gene disruption of MGG_16125 |
| MGG_16125ko5rev | TCGACCTCGAGGGGGCTTGATAGCTTTTGAGAAGAT    |                                                              |
| MGG_16125ko3fwd | GAATTCCTGCAGCCCTTCTCTTTTTTGAATTGGAG     |                                                              |
| MGG_16125ko3rev | GCTGGAGCTCCACCGGCGGCGAAGCAGCTGCGCTTG    |                                                              |
| MoSVP_UL        | AACGTCGACCTCGAGGCGTAGATTCCTCTGGATGTC    | Construction of the plasmid pCB1531-MoSV                     |
| MoSVP_U         | AACGTCGACCTCGAGGCGTAGATTCCTCTGGATGTC    |                                                              |
| pCB1636iv2fwd   | CTCGAGGTCGACGTTAACTGATATTG              |                                                              |
| pCB1636iv2rev   | GCCCGTACCCAATTCCGCTATAG                 |                                                              |
| MoSVP-U1        | ACCGCGTGGCGGCCCGCTGAGACTACGAGGAG        | Construction of the plasmid pCB-MoSVPp-mCherry               |
| MoSVP-L0        | ATCCACTAGTCTAGAAAAAGGGATTTAAAGTTTAAAG   |                                                              |
| Rp27-U1         | ATAAGAATGCGGCCGCATAAATGTAGGTATTACCTGTAC | Construction of the plasmid pCB-Rp27p-mCherry                |
| Rp27-L0         | GCTCTAGATTGAAGATTGGGTTCTACGAAAG         |                                                              |
